# Supplementary material
Source: ML conference proceedings conference paper supplement (https://www.ecva.net/papers/eccv_2022/papers_ECCV/html/136790588_ECCV_2022_paper.php)
Supplement: Supplementary file 3 [file 136790588-supp.zip]

Archive with 4 entries (4 files):
- 7210-supp.pdf
- __MACOSX/._7210-supp.pdf
- results.mp4
- __MACOSX/._results.mp4
